# Supplementary material for: Facile synthesis of 3D porous nitrogen-doped graphene as an efficient electrocatalyst for adenine sensing
Source: Royal Society of Chemistry journal article supplement (doi:10.1039/c6ra01864e), 2016-01-01
Supplement: c6ra01864e1.pdf [file c6ra01864e1.pdf]

Supporting Information

Facile synthesis of 3D porous nitrogen-doped graphene as an  
efficient electrocatalyst for adenine sensing

Junhua Li <sup>a,b,c</sup>, Jianbo Jiang <sup>a</sup>, Haibo Feng <sup>a</sup>, Zhifeng Xu <sup>b</sup>, Siping Tang <sup>b</sup>, Peihong  
Deng <sup>b</sup>, Dong Qian <sup>a,c,\*</sup>

<sup>a</sup> College of Chemistry and Chemical Engineering, Central South University, Changsha  
410083, PR China

<sup>b</sup> College of Chemistry and Material Science, Hengyang Normal University, Hengyang  
421008, PR China

<sup>c</sup> State Key Laboratory of Powder Metallurgy, Central South University, Changsha  
410083, PR China

\* Corresponding author. Tel/Fax: +86-731-88879616. E-mail address  
qiandong6@vip.sina.com (D. Qian).

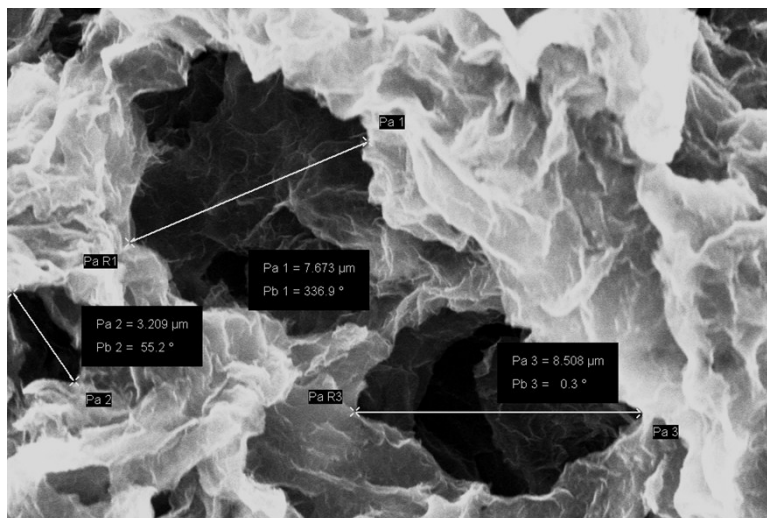

**Fig. S1** The pore sizes of 3D porous nitrogen-doped graphene

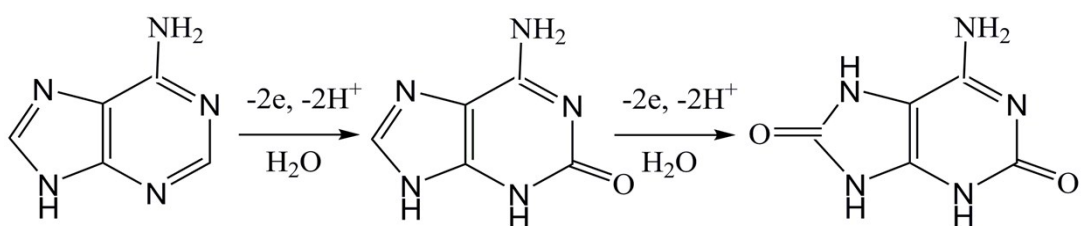

**Fig. S2** The possible mechanism for adenine oxidation at the 3D-N-GN/GCE

**Table S1** The six determination results for 1.0  $\mu\text{M}$  adenine using the same 3D-N-GN/GCE.

| Determination number | Oxidation peak current ( $\mu\text{A}$ ) | RSD (%) |
|----------------------|------------------------------------------|---------|
| 1                    | 7.139                                    | —       |
| 2                    | 7.105                                    | —       |
| 3                    | 6.989                                    | —       |
| 4                    | 6.906                                    | —       |
| 5                    | 6.802                                    | —       |
| 6                    | 6.781                                    | —       |
|                      |                                          | 2.17    |

**Table S2** The determination results for 1.0  $\mu\text{M}$  adenine using the six sensors fabricated under the same conditions.

| Electrode number | Oxidation peak current ( $\mu\text{A}$ ) | RSD (%) |
|------------------|------------------------------------------|---------|
| 1                | 7.259                                    | —       |
| 2                | 7.338                                    | —       |
| 3                | 7.192                                    | —       |
| 4                | 6.801                                    | —       |
| 5                | 6.706                                    | —       |
| 6                | 6.652                                    | —       |
|                  |                                          | 4.36    |

**Table S3** The determination results for 1.0  $\mu\text{M}$  adenine using the same sensor with the storage of one month.

| Determination time                       | Day 1 | Day 6 | Day 12 | Day 18 | Day 24 | Day 30 |
|------------------------------------------|-------|-------|--------|--------|--------|--------|
| Oxidation peak current ( $\mu\text{A}$ ) | 6.694 | 6.612 | 6.520  | 6.275  | 5.967  | 5.824  |
| Present value/original value (%)         | —     | 98.7  | 97.4   | 93.7   | 89.1   | 87.0   |

**Table S4** Influence of some possible interfering substances on the determination of 1.0  $\mu\text{M}$  adenine ( $n = 3$ ).

| Interfering substances | Concentration ( $\mu\text{M}$ ) | Oxidation potential <sup>a</sup> (V) | Relative error (%) |
|------------------------|---------------------------------|--------------------------------------|--------------------|
| Glucose                | 500                             | — <sup>b</sup>                       | 2.14               |
| Sucrose                | 500                             | —                                    | 1.75               |
| Arginine               | 500                             | —                                    | 1.63               |
| Alanine                | 500                             | —                                    | −1.81              |
| Threonine              | 500                             | —                                    | 1.56               |
| Serine                 | 500                             | —                                    | −0.96              |
| Valine                 | 500                             | —                                    | 1.12               |
| Cysteine               | 500                             | 0.325                                | −2.37              |

|               |    |       |       |
|---------------|----|-------|-------|
| Tyrosine      | 50 | 0.695 | 3.65  |
| Tryptophan    | 50 | 0.796 | 4.23  |
| Ascorbic acid | 50 | 0.119 | 3.78  |
| uric acid     | 50 | 0.492 | -2.55 |
| Dopamine      | 50 | 0.289 | 7.89  |
| Guanine       | 50 | 0.825 | 3.25  |
| Thymine       | 50 | 1.223 | 4.56  |
| Cytosine      | 50 | 1.306 | 3.68  |

<sup>a</sup> Oxidation potentials of interfering substances obtained at 3D-N-GN/GCE.

<sup>b</sup> No signal or weak signal observed.

**Table S5** The applications of 3D-N-GN/GCE for the determination of adenine in biological fluids.

| Sample       | Spiked ( $\mu\text{M}$ ) | Found <sup>a</sup> ( $\mu\text{M}$ ) | Recovery (%) | RSD <sup>b</sup> (%) |
|--------------|--------------------------|--------------------------------------|--------------|----------------------|
| Rabbit serum | 0.20                     | 0.19                                 | 95.0         | 3.9                  |
|              | 0.50                     | 0.52                                 | 104.0        | 4.2                  |
|              | 0.80                     | 0.83                                 | 103.8        | 3.2                  |
| human urine  | 0.20                     | 0.21                                 | 105.0        | 2.7                  |
|              | 0.50                     | 0.47                                 | 94.0         | 3.3                  |
|              | 0.80                     | 0.78                                 | 97.5         | 2.5                  |

<sup>a</sup> Average of five determinations; <sup>b</sup> RSD: relative standard deviation.
